# Supplementary material
Source: PubMed Central journal article supplement (PMC3161526)
Supplement: 1108918108_pnas.201108918SI.pdf [file 1108918108_pnas.201108918SI.pdf]

# Supporting Information

Tucker et al. 10.1073/pnas.1108918108

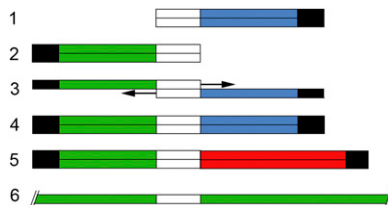

**Fig. S1.** Proposed mechanism by which a chimeric DNA fragment was introduced into the sequencing library, resulting in detection of the Alu insertion in *male germ cell-associated kinase* (*MAK*) exon 9. Lane 1, a genomic fragment from chromosome 1 (blue) with 12-bp homology to *MAK* exon 9 (white). This fragment has a linker (black) annealed to it in preparation for PCR amplification before exome capture. Lane 2, a genomic fragment from exon 9 of *MAK* (green) with 12-bp perfect homology to a sequence from chromosome 1 (white). This fragment also harbors a library amplification linker (black). Lane 3, during library amplification, the complementary sequences anneal to one another and extend (arrows) to form the blunt-ended chimeric fragment shown as lane 4. Lane 5, the Alu insertion in the proband (red) occurs immediately adjacent to the 12-bp homology with chromosome 1; thus, many library fragments have a portion of exon 9 and a portion of the Alu insertion as shown in lane 5. However, Alu repeats are physically removed from the expanded library before hybridization to the exome capture baits. As a result, the fragment illustrated in lane 5 was absent from the ABI sequencing library (Fig. S2A) and noticeably depleted from the Illumina sequencing library (Fig. S2B). Lane 6, a portion of the 120-bp exome capture bait from *MAK* exon 9 harboring the 12-bp homology with chromosome 1. Because lane 5 has been removed from the library before exome capture and because the proband has no normal copy of exon 9, the most homologous fragment remaining in the library at the time of exome capture is lane 4. The *MAK* sequences within this lane allowed the reads resulting from it to be mapped to exon 9, but the differences in sequence between the chromosome 1 portion of the chimera (blue) and the true exon 9 sequence were interpreted by the GATK algorithm as two different mutations, ultimately leading to the discovery of the Alu insertion.

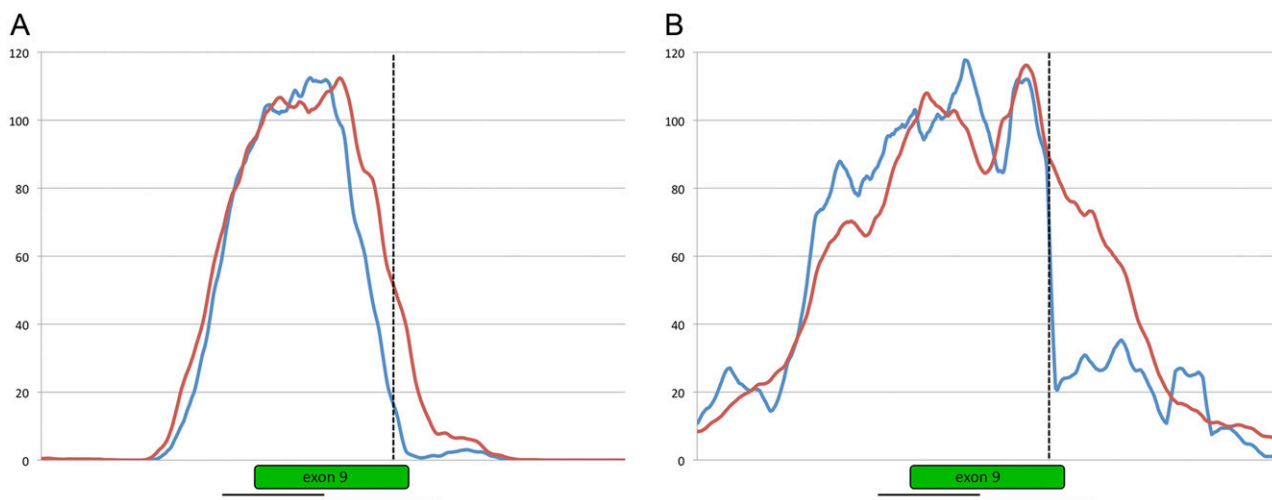

**Fig. S2.** Physical removal of Alu sequences before exome sequencing reduces the sequence coverage near the Alu insertion in exon 9. (A) This graph shows the relative frequency of each exon 9 nucleotide in the ABI exome sequence data of the proband with the Alu insertion (blue line) compared with similar data averaged from seven other individuals who do not harbor the Alu insertion (red line). For each patient, the median frequency for a nucleotide in exon 9 was set to 100, and all other frequencies were scaled accordingly. The extent of exon 9 is shown as a green box at the bottom, whereas the sequence compositions of the two exome capture baits are shown as black lines below the exon symbol. The vertical dashed line corresponds to the site of the Alu insertion. Note that the exclusion of Alu sequences before exome capture resulted in complete removal of normal sequences from the 3' end of exon 9, thereby allowing the chimeric fragment shown in Fig. S1, row 4 to be captured. (B) This graph is identical to A except that the data are derived from the paired-end Illumina sequencing experiment. The larger fragment size used in the Illumina protocol results in more nonexonic nucleotides being captured and sequenced. In addition, the physical Alu blocking was less complete than in the ABI experiment, allowing some Alu-*MAK* junction sequences to be captured and sequenced. However, the Burrows-Wheeler Aligner mapping algorithm removed these Alu sequences from the alignment (note the abrupt reduction in coverage at the Alu insertion point), and as a result, the Alu insertion was not detected with the Illumina experiment.

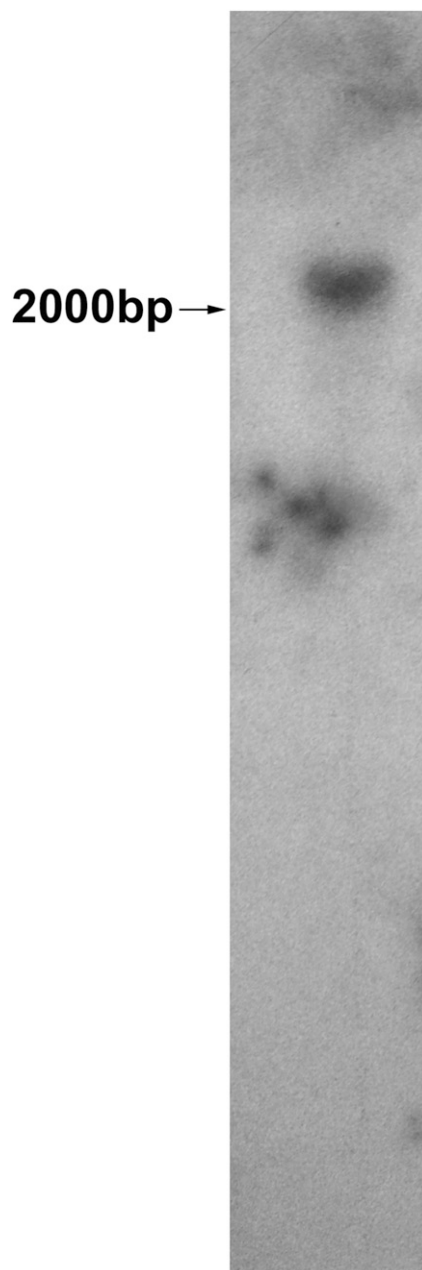

**Fig. S3.** Northern blot human retinal RNA. Northern blotting of RNA extracted from the retina of a normal human eye donor revealed the largest and most abundant MAK transcript to be slightly larger than 2,000 nt in length.

```

Human:   CCGTTGGGGCAGAACTTGCTTTCAAAAGGAGCAATGCAGAAGAAAGCATAATTAACCAATCGAAAACTATCATGC
Mouse:   TCCATGGGGCGGACCTTTCCTTCAAGAGGAGTAACGCAGAAGACAGCATAATTAACCGATTGAAAACCTGTCATGC
Zebrafish: GCGCCATTTGGAGGAGCACCAATGTCCAGAATCAGCCCAG-----
Frog:    CCCATTGGAGGAGGCATTGGTTACAATAGAACTAATGGAG-----

Human:   AATGAAACTTTTCCTGAAAAATTAGAGGACCCACAAGGAAATCTTGGAAGTTATGCTACTTACAATCAGTCAGGATAT
Mouse:   ACTGGGAAGTCTGCCGAGCAGCTAGAGGACCCACAAGGAAACCTTGGGAGCTACACCATTACAACCAGACGGGATAC
Zebrafish: -----GAAACTTTGTAAC TACAACATACAATCTCTCTGGAGGATAC
Frog:    -----GCATTTTAGGAGGTTTGTAGGTCCTTCC TACAAC TCAACT

```

**Fig. S4.** The cDNA sequence for codons 520–571 of the human full-length retinal transcript of *MAK*. The cDNA sequence for the homologous regions of mouse, zebrafish, and frog are shown below the human sequence. Exon 12 (shown in red) is present in mouse but not zebrafish or frog. An updated sequence corresponding to the retinal transcript including human exon 12 (codons 532–557) has been submitted to National Center for Biotechnology Information's RefSeq database.

**Table S1. Prioritization of exome variants**

|                            | Solid  | Illumina |
|----------------------------|--------|----------|
| All variants               | 26,712 | 23,043   |
| Quality >50                | 17,156 | 20,346   |
| Coding and splice variants | 14,915 | 17,148   |
| dbSNP                      | 2,734  | 3,500    |
| Human exome databases      | 1,013  | 1,163    |
| Local database             | 586    | 556      |
| Family structure           | 413    | 420      |

**Table S2. List of gene-specific primer pairs**

| Primer sequence         | Primer name                               |
|-------------------------|-------------------------------------------|
| GGAGTGTGCTTATGGGCAAG    | Human MAK exon 1 forward                  |
| TCGATTATATCCGGCAGAGG    | Human MAK exon 8 reverse                  |
| ACCGAAATGTTGAATTGGGA    | Human MAK exon 7 forward                  |
| GGGGGTTTATTTCCITTTCCA   | Human MAK exon 11 reverse                 |
| CTCGACAGGGGAAAACAAGA    | Human MAK exon 10 forward                 |
| ACTGAGGGAATGGGCTGTG     | Human MAK exon 13 reverse                 |
| CCCTTCGTCAAATCATCTGG    | Human MAK exon 8 forward                  |
| TCTTGTTTTCCCCTGTGCGAG   | Human MAK exon 10 reverse                 |
| TGTAAGTATGGGCAAGAGCAAT  | Mouse MAK exon 1 forward                  |
| ACCGTCTCCGGGCTCCCTTAT   | Mouse MAK exon 9 reverse                  |
| TCCCAATGCCAGTAGCGAGGC   | Mouse MAK exon 7 forward                  |
| CTACCGGTGGCCTCCACTTAA   | Mouse MAK exon 14 reverse                 |
| GATGGAACCTATGGCAGCCTTC  | Zebrafish MAK exon 1 forward              |
| CCAACTCAGGACCCATACATAAC | Zebrafish MAK exon 6 reverse              |
| GAATCATGCTAATGTGGTGA    | Zebrafish MAK exon 4 forward              |
| AAGGTTTAGCTTTGCCAGTT    | Zebrafish MAK exon 14 reverse             |
| CACATTTAGCACTGTGACTAAG  | Zebrafish MAK exon 11 forward             |
| GTTCTGCTCTCCTTTCCAT     | Zebrafish MAK exon 15 reverse             |
| AACCGATATACAACCATGAAAC  | <i>Xenopus laevis</i> MAK exon 2 forward  |
| AAGATCTGGTCAACCTCACTTG  | <i>Xenopus laevis</i> MAK exon 6 reverse  |
| TAATGTATCAAATTTTACAAGG  | <i>Xenopus laevis</i> MAK exon 4 forward  |
| CGATGGAAATGGGATCTGAC    | <i>Xenopus laevis</i> MAK exon 10 reverse |
| ATATGTAACAAAAATGCACTC   | <i>Xenopus laevis</i> MAK exon 8 forward  |
| ATGGCCTCCATATTTGGCTA    | <i>Xenopus laevis</i> MAK exon 14 reverse |
| TGAGGGGATGTGTTTCCTTC    | Human CRX forward                         |
| GCCAAGGCGTTGACAGAATA    | Human CRX reverse                         |
| CTCTACGACGTGGACGGTAA    | Human recoverin forward                   |
| CAAACCTGGATCAGTCGCAGA   | Human recoverin reverse                   |
| CCGGCAGAAGATTGTAGAGC    | Human Pax6 forward                        |
| GCCCGTTCAACATCCTTAGT    | Human Pax6 reverse                        |
| GAGAAGGCATTCAACGAAGC    | Human Chx10 forward                       |
| TCCTTGGCTGACTTGAGGAT    | Human Chx10 reverse                       |
